# Supplementary material
Source: MDPI journal article supplement (https://www.mdpi.com/2038-9582/12/1/1)

Supplementary Materials

Figure S1. Wide spread cancer distribution which is seen in epithelial ovarian cancer.

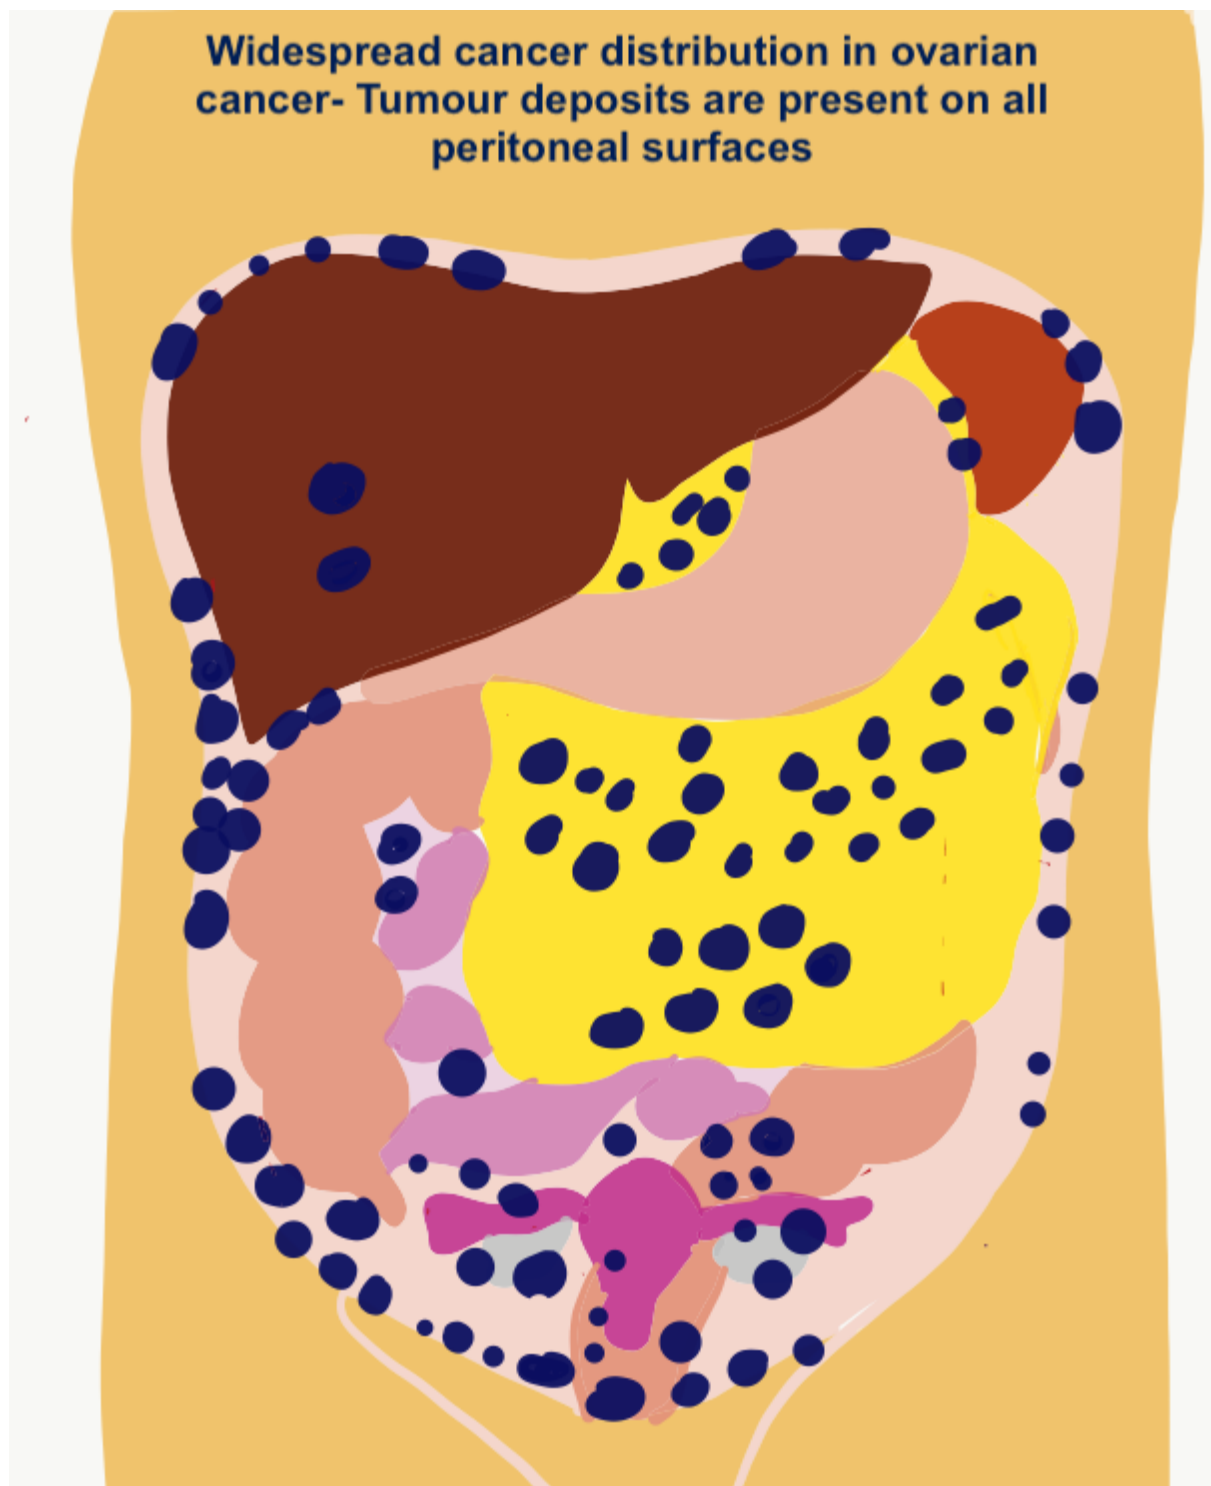

Figure S2. The supra-diaphragmatic nodes that are addressed during upper abdominal cytoreduction: cardiophrenic angle nodes (red circle); paracaval nodes (yellow circle) and costophrenic nodes (blue circle)

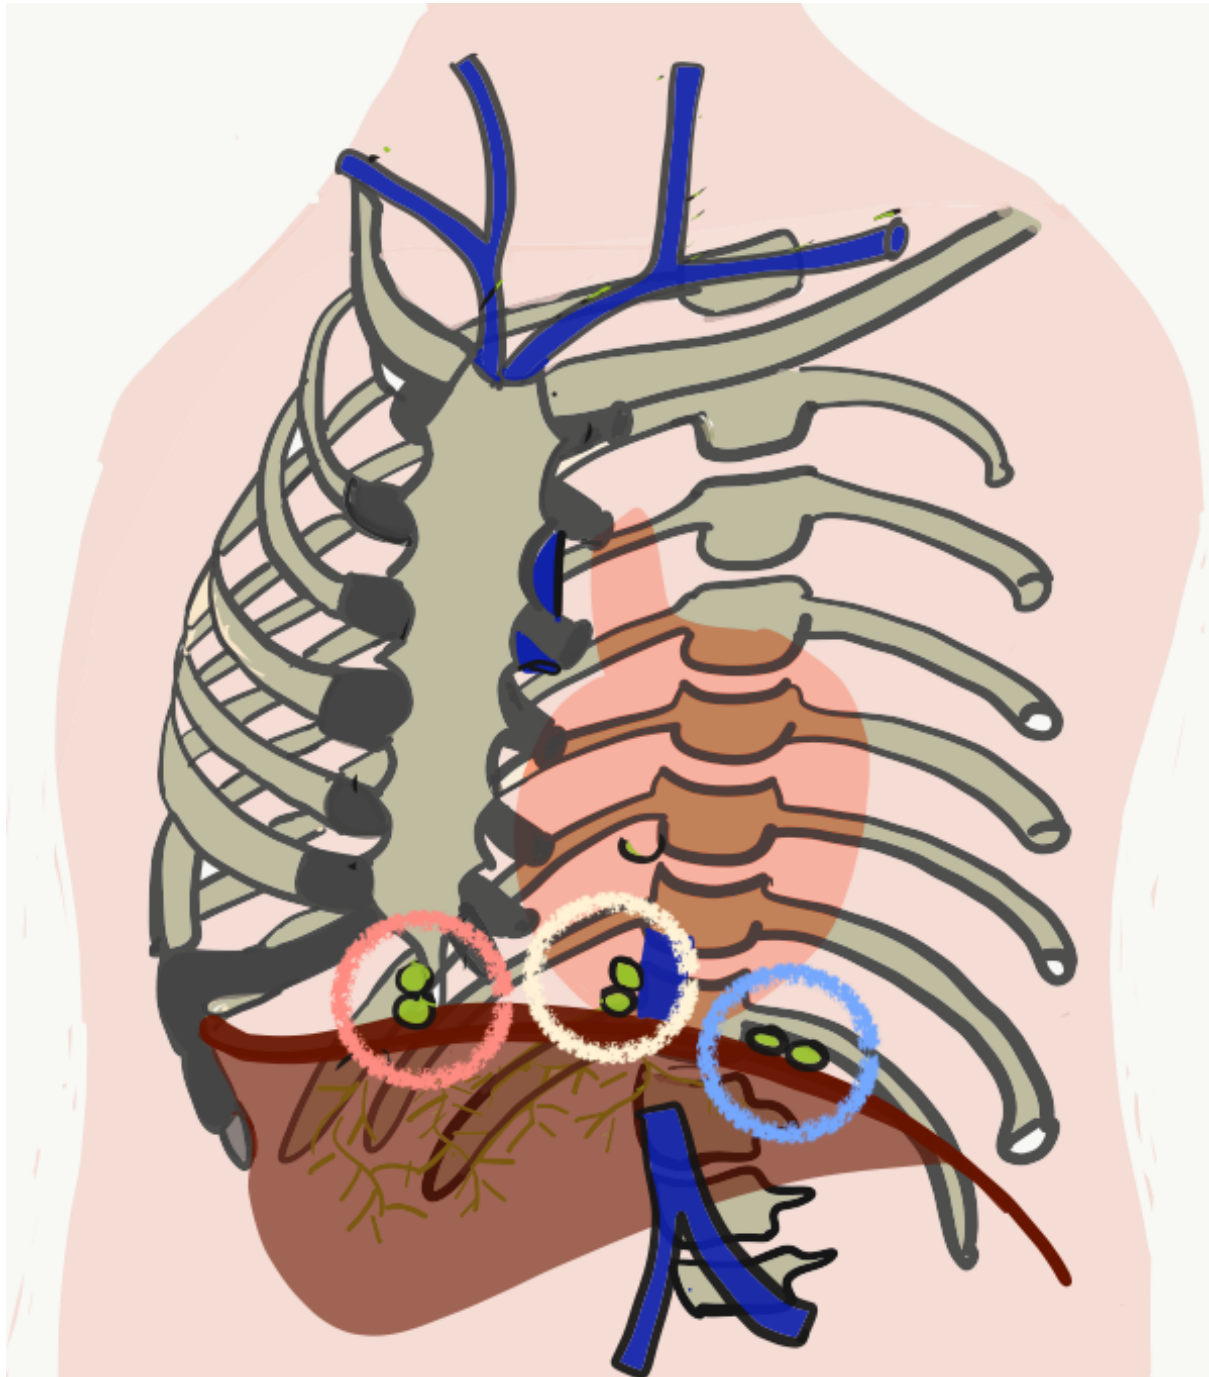

Supplement: s1 [file s1]
